# Supplementary material
Source: PubMed Central journal article supplement (PMC11540153)
Supplement: ehp14334.smcontents.508.pdf [file ehp14334.smcontents.508.pdf]

**Note to readers with disabilities:** *EHP* strives to ensure that all journal content is accessible to all readers. However, some figures and Supplemental Material published in *EHP* articles may not conform to [508 standards](#) due to the complexity of the information being presented. If you need assistance accessing journal content, please contact [ehpsubmissions@niehs.nih.gov](mailto:ehpsubmissions@niehs.nih.gov). Our staff will work with you to assess and meet your accessibility needs within 3 working days.

### **Supplemental Material**

#### **A Prospective Analysis of Per- and Polyfluoroalkyl Substances from Early Pregnancy to Delivery in the Atlanta African American Maternal–Child Cohort**

Youran Tan, Stephanie M. Eick, Anne L. Dunlop, Dana Boyd Barr, Kaitlin R. Taibl, Kyle Steenland, Kurunthachalam Kannan, Morgan Robinson, Che-Jung Chang, Parinya Panuwet, Volha Yakimavets, Carmen J. Marsit, P. Barry Ryan, and Donghai Liang

#### **Table of Contents**

**Table S1.** Experimental details on the PFAS measurements. Atlanta African American Maternal-Child Cohort, 2014-2020.

**Table S2.** Overlapped maternal serum PFAS concentrations (ng/ml) in early pregnancy from Wadsworth Center at New York State Department of Health and New York University Laboratory Hub. Atlanta African American Maternal-Child Cohort, 2014-2020.

**Table S3.** Geometric means (GMs) of four most common PFAS (ng/ml) in maternal serum in early and late pregnancy and newborn DBS among mother-newborn dyads by prenatal factors (N=199). Atlanta African American Maternal-Child Cohort, 2014-2020.

**Table S4.** Sociodemographic and clinical characteristics of study participants in the Atlanta African American Maternal-Child Cohort, 2014-2020.

**Table S5.** The Spearman correlation matrix of natural log-transformed PFAS among paired maternal samples (N=301) (A) and maternal-newborn pairs (N=199) (B).

**Table S6.** Intraclass correlation coefficients (ICC) and 95% confidence intervals (CIs) of natural log-transformed PFAS concentrations among paired maternal samples (N=376 (PFHxS, PFOS, PFOA, PFNA) or 301 (PFBS, PFDA, PFUnDA, NMFOSAA)) and maternal-newborn pairs (N=199).

**Table S7.** Adjusted percent change between natural log-transformed maternal serum PFAS concentrations (ng/ml) measured in early and late pregnancy, Atlanta African American Maternal-Child Cohort, 2014-2020.

**Table S8.** Adjusted percent change between natural log transformed newborn dried blood PFASs (ng/ml) samples and maternal serum PFASs (ng/ml) samples in early and late pregnancy, respectively, Atlanta African American Maternal-Child Cohort, 2014-2020 (N=199).

**Figure S1.** Directed acyclic graph (DAG)(<https://www.dagitty.net/>) for hypothesized relationships between repeated maternal serum per- and polyfluoroalkyl substances (PFAS) and newborn DBS PFAS.

**Figure S2.** The Spearman correlation matrix of natural log-transformed PFAS among paired maternal samples (N=301) (left) and maternal-newborn pairs (N=199) (right). The summary data can be found in Table S5.

**Figure S3.** Violin plots of PFAS transfer ratio among maternal-newborn pairs in the Atlanta African American Maternal-Child Cohort, 2014 – 2020 (N=73).

**Figure S4.** The adjusted percent change and 95% confidence interval (CI) for PFAS concentrations among maternal-newborn pairs (N=199) using inverse probability weights (IPW). A. The density plots of estimated propensity scores among N=199 subsets and remaining subsets from overall N=533 populations; B. The frequency plots of estimated propensity scores among N=199 subsets and remaining subsets from overall N=533 populations; C. The adjusted percent change and 95% confidence interval (CI) for PFAS concentrations using linear mixed effect model after applying IPW.
